# Supplementary material for: Zinc(II) and Copper(II) Complexes of 4-Styrylpyridine and 1-Adamantanecarboxylic Acid: Syntheses, Crystal Structures, and Photopolymerization
Source: MDPI journal article supplement (doi:10.3390/cryst13081226), 2023-08-09
Supplement: s1 [file s1]

# **Supplementary Material**

**for**

## **Zinc(II) and Copper(II) Complexes of 4-Styrylpyridine and 1-Adamantanecarboxylic Acid: Syntheses, Crystal Structures, and Photopolymerization**

**Dong Hee Lee <sup>†</sup>, Jaewook An <sup>†</sup>, Jihye Oh and In-Hyeok Park <sup>\*</sup>**

Graduate School of Analytical Science and Technology (GRAST), Chungnam National University,  
Daejeon 34134, South Korea

<sup>†</sup> These authors contributed equally to this work

<sup>\*</sup> Correspondence: ipark@cnu.ac.kr (I.-H. Park)

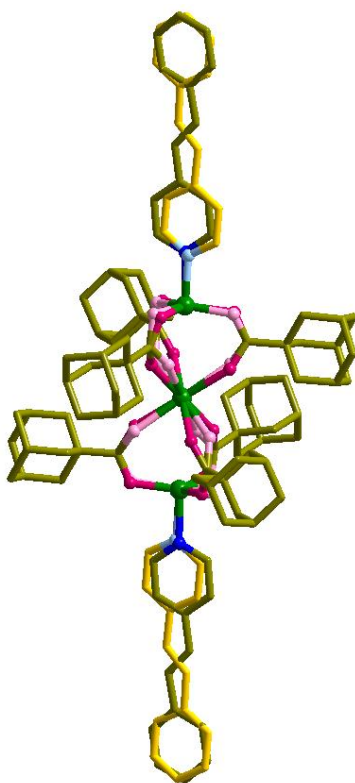

**Figure S1.** Crystal structure of  $[\text{Zn}_3(\text{spy})_2(\text{adc})_6]$  (**1**). The spy ligands and oxygen atoms of adc ligands are disordered.

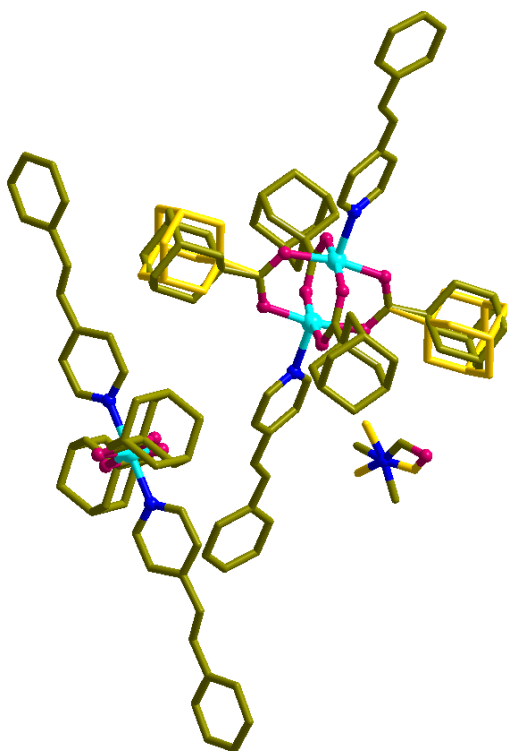

**Figure S2.** Crystal structure of  $[\text{Cu}_2(\text{spy})_2(\text{adc})_4][\text{Cu}(\text{spy})_2(\text{adc})_2] \cdot \text{DMF}$  (**2**). The adc ligands and DMF molecule are disordered.

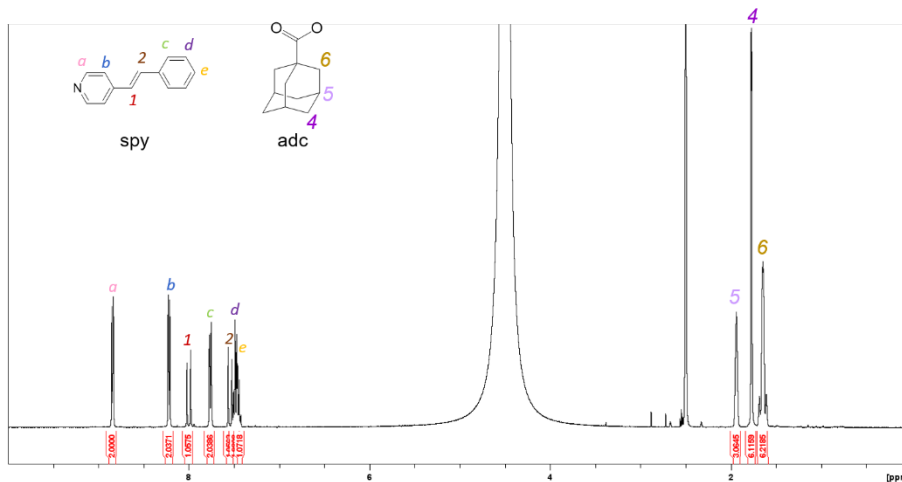

**Figure S3.**  $^1\text{H}$  NMR spectrum of **1** in  $\text{DMSO-}d_6$  with a small drop of  $\text{HNO}_3$  to dissolve the crystals.

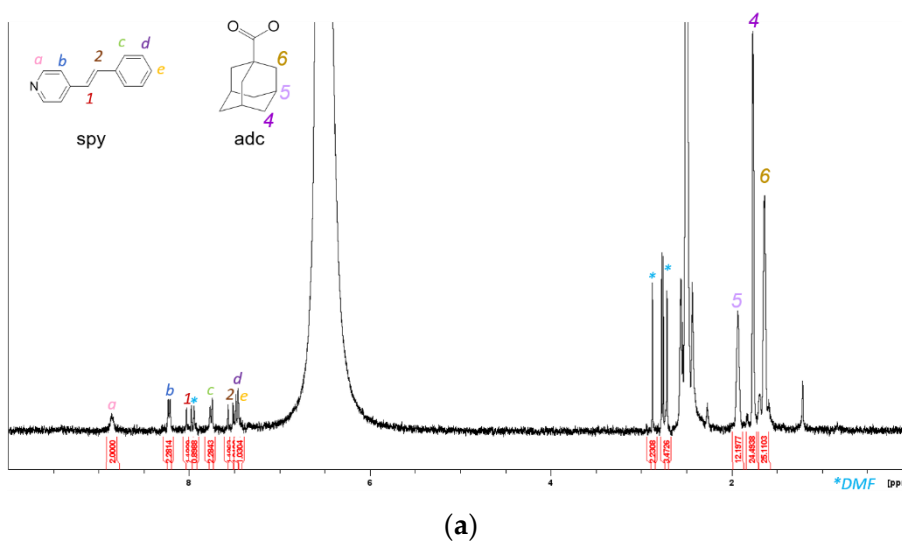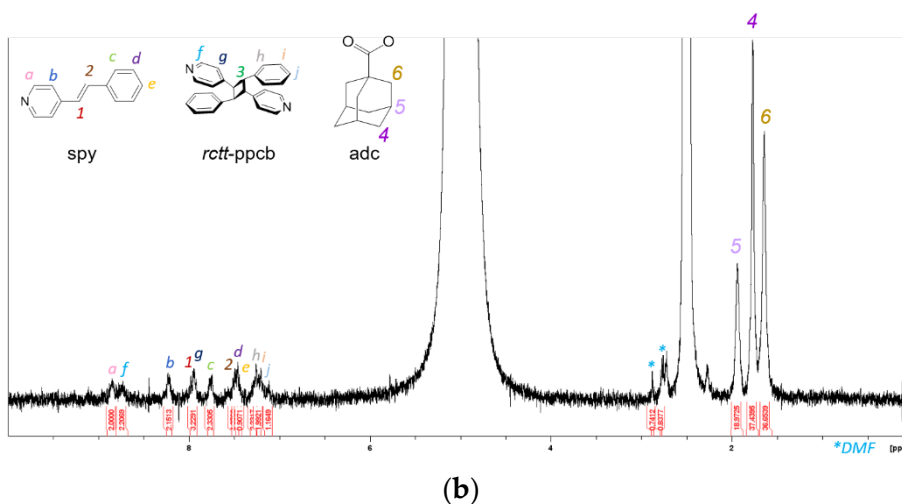

**Figure S4.**  $^1\text{H}$  NMR spectra of (a) **2** and (b) **3** in  $\text{DMSO-}d_6$  with a small drop of  $\text{HNO}_3$  to dissolve the crystals. The water peak shifted from 3.20 ppm to 6.50 and 5.00 ppm for **2** and **3**, respectively, due to the addition of  $\text{HNO}_3$ .

**Table S1.** Selected bond lengths (Å) and bond Angles (°) for **1**<sup>a</sup>

|         |           |          |           |
|---------|-----------|----------|-----------|
| Zn1-O2  | 1.964(17) | Zn1-O2X  | 2.02(2)   |
| Zn1-O3  | 1.945(19) | Zn1-O3X  | 1.92(3)   |
| Zn1-O5  | 1.940(15) | Zn1-O5X  | 1.95(3)   |
| Zn1-N1  | 2.099(3)  | Zn1-N1X  | 2.014(17) |
| Zn2-O1  | 2.254(8)  | Zn2-O1A  | 2.254(8)  |
| Zn2-O1X | 2.240(10) | Zn2-O1XA | 2.240(10) |
| Zn2-O4  | 2.299(8)  | Zn2-O4A  | 2.299(8)  |
| Zn2-O4X | 2.300(10) | Zn2-O4XA | 2.300(10) |
| Zn2-O6  | 2.306(7)  | Zn2-O6A  | 2.306(7)  |
| Zn2-O6X | 2.282(13) | Zn2-O6XA | 2.282(13) |

<sup>a</sup>Symmetry operation: (A) 1-x, 1-y, 1-z.**Table S2.** Selected bond lengths (Å) and bond Angles (°) for **2**<sup>a</sup>

|         |          |        |          |
|---------|----------|--------|----------|
| Cu1-O1A | 1.961(3) | Cu1-O2 | 1.964(3) |
| Cu1-O3A | 1.964(3) | Cu1-O4 | 1.962(3) |
| Cu1-N1  | 2.161(3) | Cu2-O5 | 1.954(2) |
| Cu2-O5B | 1.954(2) | Cu2-N2 | 2.035(3) |
| Cu2-N2B | 2.035(3) |        |          |

<sup>a</sup>Symmetry operations: (A) 1-x, 2-y, 2-z; (B) -x, 1-y, 1-z.
